# Supplementary material for: A diminished hydrophobic effect inside the GroEL/ES cavity contributes to protein substrate destabilization
Source: PubMed Central journal article supplement — Proc Natl Acad Sci U S A. 2022 Nov 21;119(48):e2213170119. doi: 10.1073/pnas.2213170119 (PMC9860310; doi:10.1073/pnas.2213170119), 2022-11-21
Supplement: pnas.2213170119.sapp.pdf [file pnas.2213170119.sapp.pdf]

## Supporting Information for

### **A diminished hydrophobic effect inside the GroEL/ES cavity contributes to protein substrate destabilization**

Ilia Korobko, Robin Benjamin Eberle, Mousam Roy and Amnon Horovitz

Amnon Horovitz

Email: [Amnon.Horovitz@weizmann.ac.il](mailto:Amnon.Horovitz@weizmann.ac.il)

#### **This PDF file includes:**

Fig. S1  
SI reference

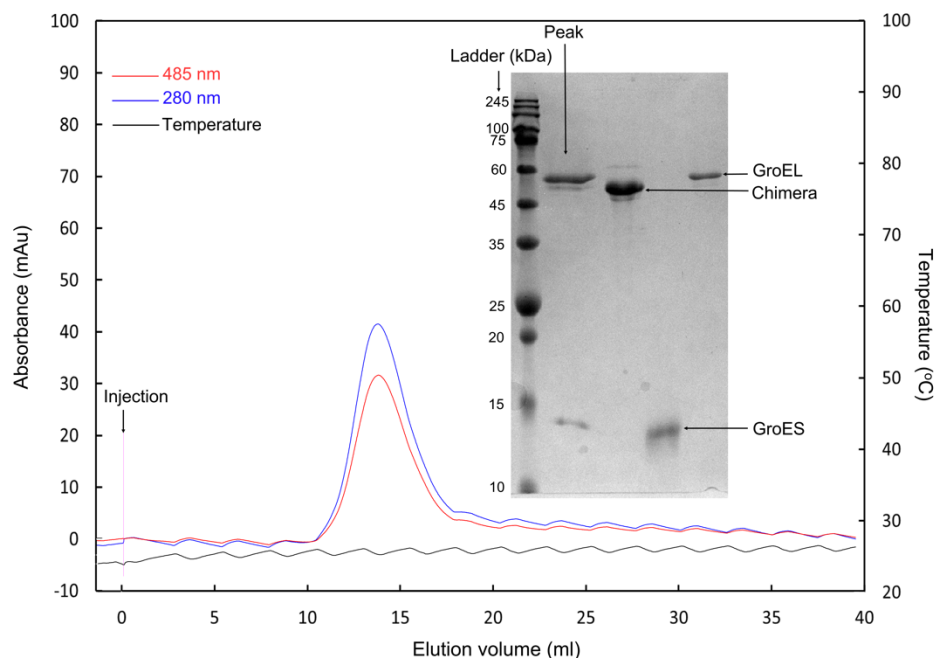

**Fig. S1.** Stability of GroEL-GroES<sub>2</sub> football-shaped complexes containing the chimera of the I61V mutant of DHFR<sub>Mp</sub> fused to eGFP. A sample of BeF<sub>x</sub>-stabilized ‘football’ complexes with the encapsulated chimera was kept at room temperature overnight and then applied to a Sepharose 6 10/300 gel-filtration column as described (1). Elution was monitored by measuring protein and eGFP absorbances at 280 (blue) and 485 (red) nm, respectively. Only one protein-containing fraction was observed and no free chimera could be detected. The baseline fluctuations are due to temperature fluctuation (black trace). SDS-PAGE analysis of this fraction (inset) showed that it contains GroEL, GroES and the chimera. Taken together, these results show that the BeF<sub>x</sub>-stabilized GroEL-GroES<sub>2</sub> football-shaped complexes remained intact and that the chimera did not escape outside during the overnight incubation. These experiments were repeated four times.

## **SI Reference**

1. I. Korobko, H. Mazal, G. Haran, A. Horovitz, Measuring protein stability in the GroEL chaperonin cage reveals massive destabilization. *eLife* 9, e56511 (2020).
